# Supplementary material
Source: PubMed Central journal article supplement (PMC6686192)
Supplement: NIHMS453854-supplement-Supplement.pdf [file NIHMS453854-supplement-Supplement.pdf]

## Supplemental materials

### *Details of the PAPA model*

Stimuli are defined by the  $x$  and  $y$ -coordinates of their horizontal and vertical bars, denoted (for the target) as  $(x_{t,H}, y_{t,H})$  and  $(x_{t,V}, y_{t,V})$  and (for the flanker) as  $(x_{f,H}, y_{f,H})$  and  $(x_{f,V}, y_{f,V})$ . For an interference zone with width  $\sigma_x$  and length  $\sigma_y$  (free parameters #1 and #2) we compute a pair of distance measures between the locations of the near-collinear and parallel bars. For end-flankers these are

$$d_{\text{colinear}} = d(x_{t,V}, y_{t,V}, x_{f,V}, y_{f,V}) \ \& \ d_{\text{parallel}} = d(x_{t,H}, y_{t,H}, x_{f,H}, y_{f,H})$$

and for side-flankers they are:

$$d_{\text{colinear}} = d(y_{t,H}, x_{t,H}, y_{f,H}, x_{f,H}) \ \& \ d_{\text{parallel}} = d(y_{t,V}, x_{t,V}, y_{f,V}, x_{f,V})$$

where  $d()$  is a two-dimensional Gaussian weighted measure of distance:

$$d(a_1, b_1, a_2, b_2) = \exp\left(\frac{(a_1 - a_2)^2}{2\sigma_x^2}\right) \exp\left(\frac{(b_1 - b_2)^2}{2\sigma_y^2}\right)$$

From these measures we compute, on a trial-by-trial basis, the magnitude of crowding, independently for collinear and parallel features, e.g.:

$$w_{\text{colinear}} = \begin{cases} w_{\text{average}}(1 - d_{\text{colinear}}) & U(0,1) < w_{\text{prob}}(1 - d_{\text{colinear}}) \\ 0 & \text{otherwise} \end{cases}$$

where  $U(0,1)$  is a uniform random variable in the interval  $(0,1)$ ,  $w_{\text{prob}}$  is a free parameter (#4) that – in combination with the distance measure - weights the probability that crowding will occur  $w_{\text{average}}$  is a free parameter (#3) modulating the strength of the interference zone on the magnitude of crowding. Having computed the weighting parameters  $w_{\text{colinear}}$  and  $w_{\text{parallel}}$  for the influence of the flanker, we compute the predicted position of the critical features within the crowded target using a standard weighted average. For end-flankers these are:

$$x_{\text{colinear}} = w_{\text{colinear}}(x_{f,V} + N(0, \sigma_{\text{noise}})) + (1 - w_{\text{colinear}})(x_{t,V} + N(0, \sigma_{\text{noise}}))$$

$$y_{\text{parallel}} = w_{\text{parallel}}(y_{f,H} + N(0, \sigma_{\text{noise}})) + (1 - w_{\text{parallel}})(y_{t,H} + N(0, \sigma_{\text{noise}}))$$

where  $N(0, \sigma_{\text{noise}})$  refers to a normal deviate with zero-mean and standard  $\sigma_{\text{noise}}$  which sets the level of additive noise applied to the encoding of bar-position ( free parameter #5) . Note that when  $w_{\text{colinear}}$  falls to zero, these expressions return the original target-bar locations (corrupted only by additive noise). For a side-flanker predicted bar-locations are:

$$x_{\text{parallel}} = w_{\text{parallel}}(x_{f,V} + N(0, \sigma_{\text{noise}})) + (1 - w_{\text{colinear}})(x_{t,V} + N(0, \sigma_{\text{noise}}))$$

$$y_{\text{colinear}} = w_{\text{colinear}}(y_{f,H} + N(0, \sigma_{\text{noise}})) + (1 - w_{\text{colinear}})(y_{t,H} + N(0, \sigma_{\text{noise}}))$$

Finally, in order to generate a predicted response from these position measures we determine the quadrant that their resulting angle (the arctangent of the  $y$  and  $x$  values) falls into and classify the result as an upwards, rightwards, leftwards or downwards facing ‘T’ accordingly.
